# Supplementary material
Source: Springer Nature journal article supplement (https://www.springerprofessional.de/resource/supplementary/13638_2011_514_MOESM1_ESM.pdf/11897982)

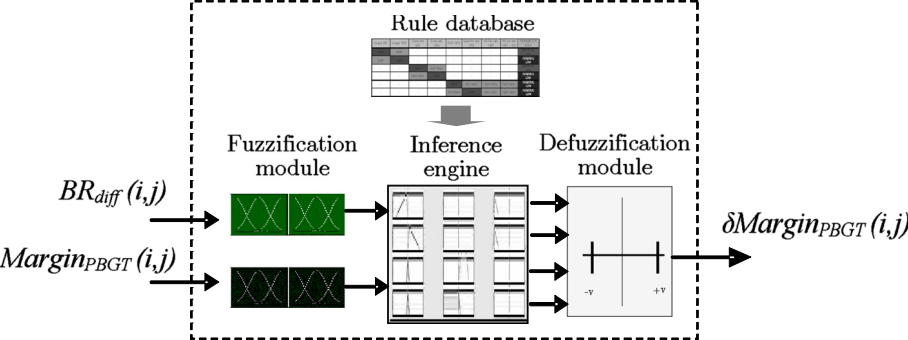

Supplement: MOESM1 [file 11897982]
